# Supplementary material
Source: PubMed Central journal article supplement (PMC4928230)
Supplement: DST645365.pdf [file DST645365.pdf]

Data for Online Appendix:

**Table 6: Impact of Partner's Diabetes Technology on their Life**

| <b>Overall Mood</b>            | <i>n</i> | %  |
|--------------------------------|----------|----|
| Much better                    | 13       | 18 |
| Somewhat better                | 38       | 51 |
| No difference                  | 17       | 23 |
| Somewhat worse                 | 5        | 7  |
| Much worse                     | 0        | 0  |
| <b>Overall Stress</b>          |          |    |
| Much better                    | 9        | 12 |
| Somewhat better                | 33       | 45 |
| No difference                  | 25       | 34 |
| Somewhat worse                 | 6        | 8  |
| Much worse                     | 0        | 0  |
| <b>Diabetes-related Stress</b> |          |    |
| Much better                    | 23       | 31 |
| Somewhat better                | 32       | 43 |
| No difference                  | 9        | 12 |
| Somewhat worse                 | 9        | 12 |
| Much worse                     | 0        | 0  |
| <b>Energy Levels</b>           |          |    |
| Much better                    | 10       | 14 |
| Somewhat better                | 30       | 41 |
| No difference                  | 29       | 39 |
| Somewhat worse                 | 4        | 5  |
| Much worse                     | 0        | 0  |
| <b>Anxiety Levels</b>          |          |    |
| Much better                    | 13       | 18 |
| Somewhat better                | 31       | 42 |
| No difference                  | 24       | 32 |
| Somewhat worse                 | 4        | 5  |
| Much worse                     | 0        | 0  |

**Table 7: Impact of Diabetes Technology on Your Daily Functioning**

|                                            | <b>Adults<br/>(n=74)</b> |    | <b>Children<br/>(n=100)</b> |    |
|--------------------------------------------|--------------------------|----|-----------------------------|----|
|                                            | <i>n</i>                 | %  | <i>n</i>                    | %  |
| <b>Impact on Daily Functioning</b>         |                          |    |                             |    |
| Yes                                        | 22                       | 30 | 76                          | 76 |
| No                                         | 45                       | 61 | 16                          | 16 |
| Unsure                                     | 7                        | 9  | 5                           | 5  |
| <b>If Yes, is it Positive or Negative?</b> |                          |    |                             |    |
| Positive                                   | 10                       | 14 | 32                          | 32 |
| Negative                                   | 2                        | 3  | 0                           | 0  |
| Positive and negative                      | 10                       | 14 | 44                          | 44 |

|                                                                                             |    |    |    |    |
|---------------------------------------------------------------------------------------------|----|----|----|----|
| <b>Impact on Their Diabetes-related Decision-Making</b>                                     |    |    |    |    |
| Yes                                                                                         | 47 | 64 | 72 | 72 |
| No                                                                                          | 16 | 22 | 11 | 11 |
| Unsure                                                                                      | 11 | 15 | 15 | 15 |
| <b>How Much of a Challenge is it for You to Help Manage your Partner's/Child's Diabetes</b> |    |    |    |    |
| Very large burden                                                                           | 2  | 3  | 16 | 16 |
| Large burden                                                                                | 6  | 8  | 29 | 29 |
| Moderate burden                                                                             | 16 | 22 | 29 | 29 |
| Slight burden                                                                               | 28 | 38 | 10 | 10 |
| No burden                                                                                   | 22 | 30 | 15 | 15 |

**Table 8: Nocturnal Waking**

|                                                                      | <b>Adults (n=74)</b> |          | <b>Children (n=100)</b> |          |
|----------------------------------------------------------------------|----------------------|----------|-------------------------|----------|
|                                                                      | <b>n</b>             | <b>%</b> | <b>n</b>                | <b>%</b> |
| <b>Do You Wake Because of Diabetes Technology?</b>                   |                      |          |                         |          |
| Yes                                                                  | 44                   | 59       | 73                      | 73       |
| No                                                                   | 30                   | 41       | 25                      | 25       |
| <b>If Yes, How Often Do You Wake During the Night?</b>               |                      |          |                         |          |
| Once a week                                                          | 15                   | 20       | 8                       | 8        |
| 2-3 times a week                                                     | 20                   | 27       | 11                      | 11       |
| 4-5 times a week                                                     | 4                    | 5        | 20                      | 20       |
| Every night                                                          | 3                    | 4        | 17                      | 17       |
| More than once per night                                             | 2                    | 3        | 17                      | 17       |
| <b>What Causes You to Wake?</b>                                      |                      |          |                         |          |
| Fear of hypoglycemia                                                 | 3                    | 4        | 19                      | 19       |
| Your partner/child experiencing hypo low BG symptoms                 | 1                    | 1        | 1                       | 1        |
| Fear of hyperglycemia                                                | 0                    | 0        | 2                       | 2        |
| Your partner/child experiencing hyper high BG symptoms               | 0                    | 0        | 2                       | 2        |
| Your partner/child needs to test their blood glucose                 | 2                    | 3        | 8                       | 8        |
| CGM alarm                                                            | 27                   | 36       | 38                      | 38       |
| Insulin pump alarm                                                   | 5                    | 7        | 2                       | 2        |
| <b>If CGM, How Often Does a 'False Alarm' Wake You in the Night?</b> |                      |          |                         |          |
| Rarely                                                               | 17                   | 23       | 26                      | 26       |
| 1-2 times a month                                                    | 11                   | 15       | 17                      | 17       |
| Once a week                                                          | 5                    | 7        | 9                       | 9        |
| More than once a week                                                | 7                    | 9        | 10                      | 10       |
| Not applicable                                                       | 3                    | 4        | 0                       | 0        |

**Table 9: Reported Satisfaction with Training for Diabetes Technology**

|                                   | <b>Adults (n=74)</b> |    | <b>Children (n=100)</b> |    |
|-----------------------------------|----------------------|----|-------------------------|----|
|                                   | <i>n</i>             | %  | <i>n</i>                | %  |
| <b>My Needs</b>                   |                      |    |                         |    |
| Very dissatisfied                 | 1                    | 1  | 3                       | 3  |
| Somewhat dissatisfied             | 6                    | 8  | 5                       | 5  |
| Neutral                           | 16                   | 22 | 8                       | 8  |
| Somewhat satisfied                | 19                   | 26 | 27                      | 27 |
| Very satisfied                    | 21                   | 28 | 56                      | 56 |
| <b>Partner's or Child's Needs</b> |                      |    |                         |    |
| Very dissatisfied                 | 0                    | 0  | 3                       | 3  |
| Somewhat dissatisfied             | 4                    | 5  | 3                       | 3  |
| Neutral                           | 6                    | 8  | 16                      | 16 |
| Somewhat satisfied                | 27                   | 36 | 25                      | 25 |
| Very satisfied                    | 34                   | 46 | 53                      | 53 |
